# Supplementary material
Source: PubMed Central journal article supplement (PMC2151724)
Supplement: plntphys_pp.107.110411_1.pdf [file plntphys_pp.107.110411_1.pdf]

Supplemental Table S1. Primer pairs flanked by *attB* sites designed for PCR amplification of the genetic elements of interest for recombination into pDONR vectors.

| <b>Primer name</b> | <b>Primer sequences <sup>a</sup></b>                                                              |
|--------------------|---------------------------------------------------------------------------------------------------|
| ATTB4F-PNOS        | <b>GGGGACAACCTTTGTATAGAAAAGTTGGAATACATGAGAATTAAGGGA</b>                                           |
| ATTB1R-PNOS        | <b>GGGGACTGCTTTTTTGTACAAACTTGTTTCGAGTTGAGAGTGAATATGA</b>                                          |
| ATTB4F-P35S        | <b>GGGGACAACCTTTGTATAGAAAAGTTGGAAGAGCCAAGCTGATCTCC</b>                                            |
| ATTB1R- P35S       | <b>GGGGACTGCTTTTTTGTACAAACTTGTGTCCTCTCCAAATGAAATGA</b>                                            |
| ATTB4F-PROLD       | <b>GGGGACAACCTTTGTATAGAAAAGTTGGAGAATTTGTTTCGTGAACT</b>                                            |
| ATTB1R- PROLD      | <b>GGGGACTGCTTTTTTGTACAAACTTGTGATCCTCTAGCGAATTTTCT</b>                                            |
| ATTB4F-PCSVMV      | <b>GGGGACAACCTTTGTATAGAAAAGTTGGAAGCTTGTTTAAACCCAGAA<br/>G</b>                                     |
| ATTB1R-PCSVMV      | <b>GGGGACTGCTTTTTTGTACAAACTTGTGAGATCTACAACTTACAAATT<br/>T</b>                                     |
| ATTB4F-UBI         | <b>GGGGACAACCTTTGTATAGAAAAGTTGGACTGCAGTGCAGCGTGACCC</b>                                           |
| ATTB1R-UBI         | <b>GGGGACTGCTTTTTTGTACAAACTTGTAGAGGGTGTGGAGGGGGTGT</b>                                            |
| ATTB1R-UBIF        | <b>GGGGACTGCTTTTTTGTACAAACTTGTGCAGAAGTAACACCAAACAA<br/>C</b>                                      |
| MINI2NF            | ATTTGGAGAGGACACGCTGGCTCCATGCAGCCTTCTCT                                                            |
| ATTB1F-MINI2       | <b>GGGGACAAGTTTGTACAAAAAAGCAGGCTTAGCAAGACCCTTCCTCT<br/>ATATAAGGAAGTTCATTTTATTTGGAGAGGACACGCTG</b> |
| ATTB1F-GUS         | <b>GGGGACAAGTTTGTACAAAAAAGCAGGCTTAATGTTACGTCCTGT<br/>AGAAACC</b>                                  |
| ATTB2F-GUS         | <b>GGGGACAGCTTTCTTGTACAAAGTGGGAATGTTACGTCCTGTAGAAAC<br/>C</b>                                     |
| ATTB2R-GUS         | <b>GGGGACCACTTTGTACAAGAAAGCTGGGTATTGTTTGCCTCCCTGCT<br/>GC</b>                                     |
| ATTB3RSTOP-GUS     | <b>GGGGACAACCTTTGTATAATAAAGTTGTTTCATTGTTTGCCTCCCTGCT</b>                                          |
| ATTB3R-GUS         | <b>GGGGACAACCTTTGTATAATAAAGTTGTTTGTGTTTGCCTCCCTGCTGC</b>                                          |

|                         |                                                                            |
|-------------------------|----------------------------------------------------------------------------|
| ATTB1F-LUC              | <b>GGGGACAAGTTTGTACAAAAAAGCAGGCTTAAGATCTCTGTGGGACAAG</b>                   |
| ATTB2F-LUC              | <b>GGGGACAGCTTTCTTGTACAAAGTGGGAAGATCTCTGTGGGACAAG</b>                      |
| ATTB2R-LUC              | <b>GGGGACCACTTTGTACAAGAAAGCTGGGTACAATTTGGACTTTCCGC</b><br>C                |
| ATTB3R-LUC              | <b>GGGGACAACCTTTGTATAATAAAGTTGTCAATTTGGACTTTCCGCC</b>                      |
| ATTB1F-GFP<br>(YFP,CFP) | <b>GGGGACAAGTTTGTACAAAAAAGCAGGCTTAATGGTGAGCAAGGGC</b><br>GAGGAG            |
| ATTB2R-GFP              | <b>GGGGACCACTTTGTACAAGAAAGCTGGGTATTACTTGTACAGCTCGT</b><br>CCATGCC          |
| NLS-GFP (YFP,CFP)       | GCAGCCTTCTCTTAAACGCATGAAAATAGAGCCATCTTCTCAACCTATG<br>GTGAGCAAGGGCGAGGAG    |
| ATTB1F-NLS              | <b>GGGGACAAGTTTGTACAAAAAAGCAGGCTCCATGCAGCCTTCTCTTA</b><br>AACGCA           |
| ATTB2F-GFP<br>(YFP,CFP) | <b>GGGGACAGCTTTCTTGTACAAAGTGGGAATGGTGAGCAAGGGCGAG</b><br>GAG               |
| ATTB3R-<br>GFP(YFP,CFP) | <b>GGGGACAACCTTTGTATAATAAAGTTGTTTACTTGTACAGCTCGTCCAT</b><br>GCC            |
| ATTB1F-DSRED            | <b>GGGGACAAGTTTGTACAAAAAAGCAGGCTTAATGGACAACACCGAGG</b><br>AC               |
| ATTB2F-DSRED            | <b>GGGGACAGCTTTCTTGTACAAAGTGGGAATGGACAACACCGAGGAC</b>                      |
| ATTB2R-DSRED            | <b>GGGGACCACTTTGTACAAGAAAGCTGGGTA</b> CTGGGAGCCGGAGTGG<br>C                |
| ATTB3RSTOP-<br>DSRED    | <b>GGGGACAACCTTTGTATAATAAAGTTGTCTACTGGGAGCCGGAGTGGC</b>                    |
| ATTB3R-DSRED            | <b>GGGGACAACCTTTGTATAATAAAGTTGTCTGGGAGCCGGAGTGGC</b>                       |
| NLS-DSRED               | ATCAATGCAGCCTTCTCTTAAACGCATGAAAATAGAGCCATCTTCTCAA<br>CCTATGGACAACACCGAGGAC |
| ATTB4F-ERGFP            | <b>GGGGACAACCTTTGTATAGAAAAGTTGGAATGGTGAAGACTAATCTTTT</b><br>TC             |
| ATTB3R-ERGFP            | <b>GGGGACAACCTTTGTATAATAAAGTTGTTTACAGCTCGTCCTTCTTGT</b>                    |
| ATTB2F- NOST            | <b>GGGGACAGCTTTCTTGTACAAAGTGGGACTAGAGTCAAGCAGATCGT</b><br>T                |
| ATTB3R- NOST            | <b>GGGGACAACCTTTGTATAATAAAGTTGTTTCGATCTAGTAACATAGATGA</b>                  |
| ATTB2F- 35ST            | <b>GGGGCAGCTTTCTTGTACAAAGTGG</b> GAGGTCACTGGATTTTGGTT                      |

|                |                                                                    |
|----------------|--------------------------------------------------------------------|
| ATTB3R- 35ST   | <b>GGGGCAACTATGTATAATAAAGTTGGCGGCCATGCTAGAGTCC</b>                 |
| ATTB2F- OCST   | <b>GGGGACAGCTTTCTTGTACAAAAGTGGGACTGCTTTAATGAGATATGCC</b><br>A      |
| ATTB3R- OCST   | <b>GGGGACAACCTTTGTATAATAAAGTTGTATTTAGGTGACACTATAGAAT</b><br>A      |
| AttB2F-G7      | <b>GGGGACAGCTTTCTTGTACAAAAGTGGGACCCCGATGAGCTAAGCTAG</b><br>CT      |
| AttB3R- G7     | <b>GGGGACAACCTTTGTATAATAAAGTTGTA</b> CTCGGCCGTCGAGTACATG           |
| ATTB1F-LHATOG4 | <b>GGGGACAAGTTTGTACAAAAAAGCAGGCTTAATGAAACCGGTAACGT</b><br>TATACGA  |
| ATTB1F-GR      | <b>GGGGACAAGTTTGTACAAAAAAGCAGGCTTAATGGCTAGTGAAGCTC</b><br>GAAAAACA |
| ATTB2R-LHATOG4 | <b>GGGGACCACTTTGTACAAGAAAGCTGGGTATCACTCCTTCTTAGGGTT</b><br>A       |

<sup>a</sup> The *attB* sites are in bold.
